# Supplementary material for: Diffusive confinement of free radical intermediates in the OH radical oxidation of semisolid aerosols
Source: Royal Society of Chemistry journal article supplement (doi:10.1039/c7cp00696a), 2017-01-01
Supplement: c7cp00696a1.pdf [file c7cp00696a1.pdf]

1 **Electronic Supporting Information**

2 **Diffusive Confinement of Free Radical Intermediates in the OH Radical**  
3 **Oxidation of Semisolid Aerosol**

4  
5 Aaron A. Wiegel,<sup>a</sup> Matthew J. Liu,<sup>a,b</sup> William D. Hinsberg,<sup>c</sup> Kevin R. Wilson,<sup>†a</sup> and  
6 Frances A. Houle<sup>†a</sup>

7  
8 <sup>a</sup>*Lawrence Berkeley National Laboratory, Chemical Sciences Division, Berkeley, CA, USA*  
9 *94702*

10 <sup>b</sup>*University of California, Berkeley, Department of Chemical and Biomolecular Engineering,*  
11 *Berkeley, CA, USA 94702*

12 <sup>c</sup>*Columbia Hill Technical Consulting, Fremont, CA, USA 94539*

13  
14  
15 **Contents:**

- 16  
17 **S1.** Simulation geometry, dynamic volume calculation and role of free volume in diffusion steps  
18 **S2.** Uncorrected and shape-corrected experimental particle size as a function of OH exposure  
19 **S3.** Framework validation: simulations of squalane (well mixed liquid) to evaluate effect of  
20 compartment size and volume correction method  
21 **S4.** Calculation of barrier to fragmentation of alkoxy radical with adjacent carboxylic acid group  
22 **S5.** Semi-detailed description of acyloxy radical fragmentation processes  
23 **S6.** Determination of evaporation rate coefficients for fragments  
24 **S7.** Dynamic viscosity measurement of triacontane to estimate self-diffusion coefficient  
25 **S8.** Maps of peroxy radicals during oxidation  
26 **S9.** Additional plasticized particle Scenario 2A  
27  
28  
29

30 **S1. Simulation Geometry and Diffusion**

31 A radial core of Cartesian compartments is used to represent the aerosol volume. The volume of  
32 each compartment is initialized so that a whole number of molecules will fit in the compartment.  
33 In the case of triacontane, using its macroscopic density of 0.81 g cm<sup>-3</sup> and molecular mass of  
34 422 g mol<sup>-1</sup>, the molecular volume of triacontane molecule is found to be approximately 8.65 ×  
35 10<sup>-23</sup> cm<sup>3</sup> molecule<sup>-1</sup>. The number of molecules of triacontane in each compartment is chosen to  
36 be 100 molecules, which corresponds to a volume of approximately 8.65 × 10<sup>-20</sup> cm<sup>3</sup>. Each  
37 compartment is set to be a fixed height along the radial axis of the core, 0.5 nm (5 × 10<sup>-8</sup> cm).  
38 The two orthogonal dimensions are each 1.32 × 10<sup>-6</sup> cm. Using this geometry, the average 109  
39 nm diameter triacontane aerosol is simulated using a radial core of 109 0.5 nm thick Cartesian  
40 compartments.

41  
42 We note that for this class of simulation codes, which are a type of kinetic Monte Carlo, the size  
43 of the compartment is chosen to provide sufficient spatial resolution while keeping the

44 calculation to a reasonable size. The core consideration is that a single compartment is treated as  
45 well mixed at all times. Thus, the only geometry constraint is that the size of the compartment is  
46 small relative to the scale of relevant inhomogeneities in the system. The relative rates of various  
47 processes such as a chemical step or gradient-driven transfer of a species between two  
48 compartments are unimportant since individual events are randomly selected and propagated one  
49 at a time and the time step for each cycle is calculated from the instantaneous reaction rates.<sup>1-3</sup>  
50 This consideration is different than that pertinent to finite difference and similar coupled  
51 differential equation integration treatments of reaction-diffusion kinetics. In such calculations, a  
52 time step is specified and the entire system is evolved at once. Because of the integration  
53 process, there are limits to the range of relative rates that can be accurately accommodated in  
54 each cycle, and compartment sizes have to be chosen accordingly.

55

56 The volume of the particle and thus the compartment volumes change as the reaction proceeds.  
57 The instantaneous volume is calculated using the partial volumes of the reactive functional  
58 groups defined in the semi-detailed description, the carbon backbone, and free volume  
59 components. First, the van der Waals volumes of the two methyl groups and twenty-eight  
60 methylene groups from X-ray diffraction data<sup>4</sup> are summed to obtain a value for the van der  
61 Waals volume of the triacontane molecule of  $5.21 \times 10^{-22} \text{ cm}^3 \text{ molecule}^{-1}$ . This value is  
62 subtracted from the molecular volume calculated above from the macroscopic density to obtain  
63 the free volume of triacontane.<sup>5</sup> This free volume is then divided equally among the thirty carbon  
64 atoms to obtain a free volume per carbon of approximately  $1.15 \times 10^{-23} \text{ cm}^3$ . This value is  
65 consistent with previous estimates of the free volume per carbon atom of linear hydrocarbons at  
66 room temperature.<sup>6</sup> A separate species termed “bulk” is assigned this free volume per carbon  
67 atom and is also used in diffusion as described below. In order to obtain the volume of the  
68 functional groups and carbon backbone of triacontane, first, the covalent radius of the hydrogen-  
69 carbon bond (110 pm)<sup>7</sup> is used to calculate the volume of a methyl or a methylene hydrogen  
70 atom ( $5.56 \times 10^{-24} \text{ cm}^3$ ). The volume of two and three hydrogen atoms is then used as the volume  
71 of the methylene and methyl groups, respectively. Then, the volume of sixty-two hydrogen  
72 atoms is then subtracted from the overall van der Waals volume to obtain the volume of the 30-  
73 carbon backbone ( $1.76 \times 10^{-22} \text{ cm}^3$ ). In addition, each of the smaller carbon backbones from  
74 fragmentation reactions are given a proportional amount of volume of a 30-carbon backbone, e.g.  
75 a 23-carbon backbone has a volume that is  $23/30^{\text{th}}$  of the 30-carbon backbone. Finally, the van  
76 der Waals volume from X-ray diffraction<sup>4</sup> of the various functional groups formed after  
77 oxidation (carbonyls, alcohols, and carboxylic acids) is used after removing the contribution  
78 from a single carbon atom. Notably, defining the volume (and thus density) of the various  
79 functional groups and carbon backbones using the associated van der Waals volumes yields the  
80 same simple parameterization of the mass density used in previous publications<sup>8, 9</sup> where an  
81 addition of an oxygen atom increases the density by  $0.03 \text{ g cm}^{-3}$ .

82

83 Each compartment is assumed to be instantaneously mixed. Species move between  
84 compartments according to standard Fickian diffusion kinetics, with the diffusion distance per  
85 event calculated from the centers of the two compartments involved. In condensed phases,  
86 diffusion is mediated by availability of transient free volumes that allow a molecule to move  
87 from one location to another. Free volume is uniform throughout the particle. Accordingly,  
88 diffusion of a molecular species (oxidant, functional group, carbon backbone) from a  
89 compartment to its neighbor is simulated by an exchange process that requires a free volume

90 species “bulk” to be available in the adjacent compartment and trade places. If no bulk species  
 91 are present in a compartment no molecular species can diffuse into it.

92

93 The simulation code also supports non-Fickian (environment-sensitive) diffusion kinetics. This  
 94 was implemented as follows to test the possibility of non-Fickian diffusion in Scenarios 1A and  
 95 2A (See Section 9 below).. In these these model scenarios, the production of carbon backbone  
 96 species with a carbon number less than 16 results in the conversion of the free volume species  
 97 “bulk” into a separate free volume species “bulk2” that can undergo exchange diffusion with all  
 98 functional groups and carbon backbones with a different diffusion coefficient of  $8.3 \times 10^{-14} \text{ cm}^2$   
 99  $\text{molecules}^{-1} \text{ s}^{-1}$ . The species “bulk2” otherwise is treated in the model exactly like the original  
 100 “bulk” free volume species.

101

102

103 **Table S1.** Species type and molecular volume of the functional group, carbon number, and free  
 104 volume species.

| Species                  | Species Type     | Molecular volume ( $\text{cm}^3 \text{ molecule}^{-1}$ ) |
|--------------------------|------------------|----------------------------------------------------------|
| bulk                     | Free Volume      | $1.15 \times 10^{-23}$                                   |
| bulk2 <sup>a</sup>       | Free Volume      | $1.15 \times 10^{-23}$                                   |
| site                     | Free Volume      | $1.15 \times 10^{-23}$                                   |
| Carbon Atom <sup>b</sup> | Carbon Backbone  | $5.86 \times 10^{-24}$                                   |
| Aldehyde or Ketone       | Functional Group | $1.36 \times 10^{-23}$                                   |
| Alcohol                  | Functional Group | $7.50 \times 10^{-24}$                                   |
| Carboxylic Acid          | Functional Group | $2.66 \times 10^{-23}$                                   |

105 <sup>a</sup> Used to describe non-Fickian diffusion. See below for more details

106 <sup>b</sup> Multiply by the number of carbon atoms to get the total molecular volume for a carbon  
 107 backbone.

108

109

110 The results from the simulations are corrected to account for the fact that a radial core of  
 111 constant cross section does not correctly represent the cone appropriate to a spherical particle.  
 112 The core overweights the contributions to the composition from the compartments toward the  
 113 center of the particle, and the extent of overweighting decreases as the particle loses mass. The  
 114 correction is as follows. The thickness of each Cartesian compartment in the radial direction is  
 115 considered to be the same as the thickness of an equivalent spherical shell. The initial radial ( $r_i$ )  
 116 and final radial coordinates ( $r_f$ ) are then used to find the volume a spherical shell ( $V_{\text{shell}}$ ) as  
 117 follows:

$$118 \quad V_{\text{shell}} = \frac{4}{3}\pi(r_f^3 - r_i^3). \quad (\text{S1})$$

119 The ratio of the volume of the shell and the volume of the Cartesian compartment ( $V_{\text{box}}$ ) is then  
 120 used to weight the amount of any given species ( $N$ ) by its position in along the radial axis as  
 121 follows:

$$122 \quad N_{\text{corr}} = \frac{V_{\text{shell}}}{V_{\text{box}}}N. \quad (\text{S2})$$

123

124

125 **S2. Uncorrected and shape-corrected experimental particle size as a function of**  
 126 **OH exposure**

127 The simulations assume a spherical aerosol particle shape; however, the semisolid  
 128 triacontane aerosol formed in the experiment is likely non-spherical.<sup>10</sup> In addition, the effective  
 129 density of the particles derived from the ratio of the vacuum aerodynamic diameter and the  
 130 mobility diameter of the aerosol is 0.73 g cm<sup>-3</sup> when the actual density of triacontane is much  
 131 higher (0.81 g cm<sup>-3</sup>). Further evidence for a shape change in the aerosol is observed by the sharp  
 132 discontinuity in the mass in between an OH exposure of 3 × 10<sup>11</sup> molecules cm<sup>-3</sup> s and 10<sup>12</sup>  
 133 molecules cm<sup>-3</sup> s.

134 To correct for the non-spherical shape of the aerosol for these first few points, a dynamic  
 135 shape factor was applied to the experimental mass estimate for the unreacted triacontane and the  
 136 first two points in the oxidation.<sup>11</sup> The dynamic shape factor used for triacontane was 1.07 and  
 137 based on the ratio of the effective and actual density of the starting material. The first two  
 138 measured points in the oxidation were assumed to have dynamic shape factors of 1.03 and 1.015,  
 139 although these are far more uncertain because the actual density of the particles once they are  
 140 oxidized is unknown. Fortunately, despite this uncertainty, correcting these points for a non-  
 141 spherical shape is far less important for an accurate model-measurement comparison than  
 142 correcting the initial triacontane aerosol mass for shape since the data are normalized to the  
 143 initial mass. After the second measured point in the oxidation, the aerosol is assumed to be  
 144 spherical with a dynamic shape factor of 1.0. After the initial mass is corrected for shape, the  
 145 change in aerosol mass upon oxidation becomes much more continuous during the initial stages  
 146 in oxidation. The corrected and uncorrected mass data, the effective density, and the average  
 147 volume are given in the Table S4.

148 **Table S2.** Experimental data for the oxidation of triacontane aerosol by OH radicals.

| OH exposure<br>(molecules cm <sup>-3</sup><br>s) | Mobility<br>diameter (nm) | Effective density<br>(g cm <sup>-3</sup> ) | Normalized<br>Mass <sup>a</sup> | Dynamic Shape<br>Factor |
|--------------------------------------------------|---------------------------|--------------------------------------------|---------------------------------|-------------------------|
| 0                                                | 113.2                     | 0.73                                       | 1 (1)                           | 1.073                   |
| 3.07 × 10 <sup>11</sup>                          | 112.9                     | 0.77                                       | 1.02 (1.05)                     | 1.030                   |
| 6.33 × 10 <sup>11</sup>                          | 102.7                     | 0.84                                       | 1.01 (0.87)                     | 1.015                   |
| 9.89 × 10 <sup>11</sup>                          | 97.4                      | 1.04                                       | 1.01 (0.91)                     | 1                       |
| 1.45 × 10 <sup>12</sup>                          | 95.8                      | 1.13                                       | 1.04 (0.94)                     | 1                       |
| 1.75 × 10 <sup>12</sup>                          | 95.1                      | 1.17                                       | 1.06 (0.95)                     | 1                       |
| 2.72 × 10 <sup>12</sup>                          | 91.4                      | 1.30                                       | 1.05 (0.94)                     | 1                       |
| 3.86 × 10 <sup>12</sup>                          | 87.7                      | 1.41                                       | 1.00 (0.90)                     | 1                       |
| 4.61 × 10 <sup>12</sup>                          | 86.4                      | 1.47                                       | 1.00 (0.90)                     | 1                       |
| 5.27 × 10 <sup>12</sup>                          | 87.2                      | 1.49                                       | 1.04 (0.93)                     | 1                       |
| 5.80 × 10 <sup>12</sup>                          | 83.3                      | 1.51                                       | 0.92 (0.82)                     | 1                       |
| 6.80 × 10 <sup>12</sup>                          | 82.1                      | 1.53                                       | 0.89 (0.80)                     | 1                       |
| 8.26 × 10 <sup>12</sup>                          | 81.3                      | 1.53                                       | 0.86 (0.78)                     | 1                       |
| 9.30 × 10 <sup>12</sup>                          | 80.1                      | 1.55                                       | 0.84 (0.75)                     | 1                       |

149 <sup>a</sup> The uncorrected mass data is shown in parentheses.

150

151 **S3. Framework validation: simulations of squalane (well mixed liquid) to**  
152 **evaluate effect of compartment size and volume correction method**

153 The validity of the description of uptake and evaporation and the geometry correction for  
154 triacontane is tested by predicting full reaction-diffusion kinetics for squalane and comparing it  
155 to previously validated results assuming instantaneous mixing.<sup>8</sup>

156  
157 In our previous work on squalane oxidation, we used two different descriptions. In the first,  
158 reaction-diffusion out to 3 generations was simulated using compartments with surface areas of  
159 80 x 80 nm, 1 nm thick and involved explicit adsorption.<sup>12</sup> This study showed that multi-  
160 compartment and single-compartment reaction simulations are equivalent for squalane out to 3  
161 generations of oxidation, where volume loss is minimal. In the second, semidetailed simulations  
162 of squalane functionalization and fragmentation to 10 generations involved a single compartment  
163 and implicit adsorption because the system was well-mixed.<sup>8</sup> We used the semi-detailed  
164 mechanism for squalane in a reaction-diffusion model with sixteen 5 nm × 5 nm × 5 nm  
165 compartments (equivalent to the 160 nm diameter particle). These compartments are large to  
166 make the simulations practical, smaller compartments are computationally much more expensive  
167 because of the rapid diffusion kinetics. The choice of larger compartments leads to noticeable  
168 discretization (steps) in the simulation results but does not affect their accuracy because the  
169 system is well-mixed throughout the reaction, i.e. there are no spatial inhomogeneities in  
170 composition.

171  
172 To perform the test described in this section, one change was made. A pseudo-first order  
173 adsorption rate constant of 1.17 s<sup>-1</sup> is used instead of 10 s<sup>-1</sup> as in the earlier study.<sup>12</sup> The lower  
174 value is due to 2 differences – the compartment area is 0.00391 of that used previously, while the  
175 difference in adsorption site definition necessitated by the semi-detailed description increases the  
176 rate constant by a factor of 30.

177  
178 The results in Fig S1 show the agreement is satisfactory, demonstrating that the uptake-  
179 evaporation-diffusion kinetics framework used for triacontane, where transport is very slow, is  
180 predictive for 10 generations of squalane oxidation where transport is fast.

181  
182  
183

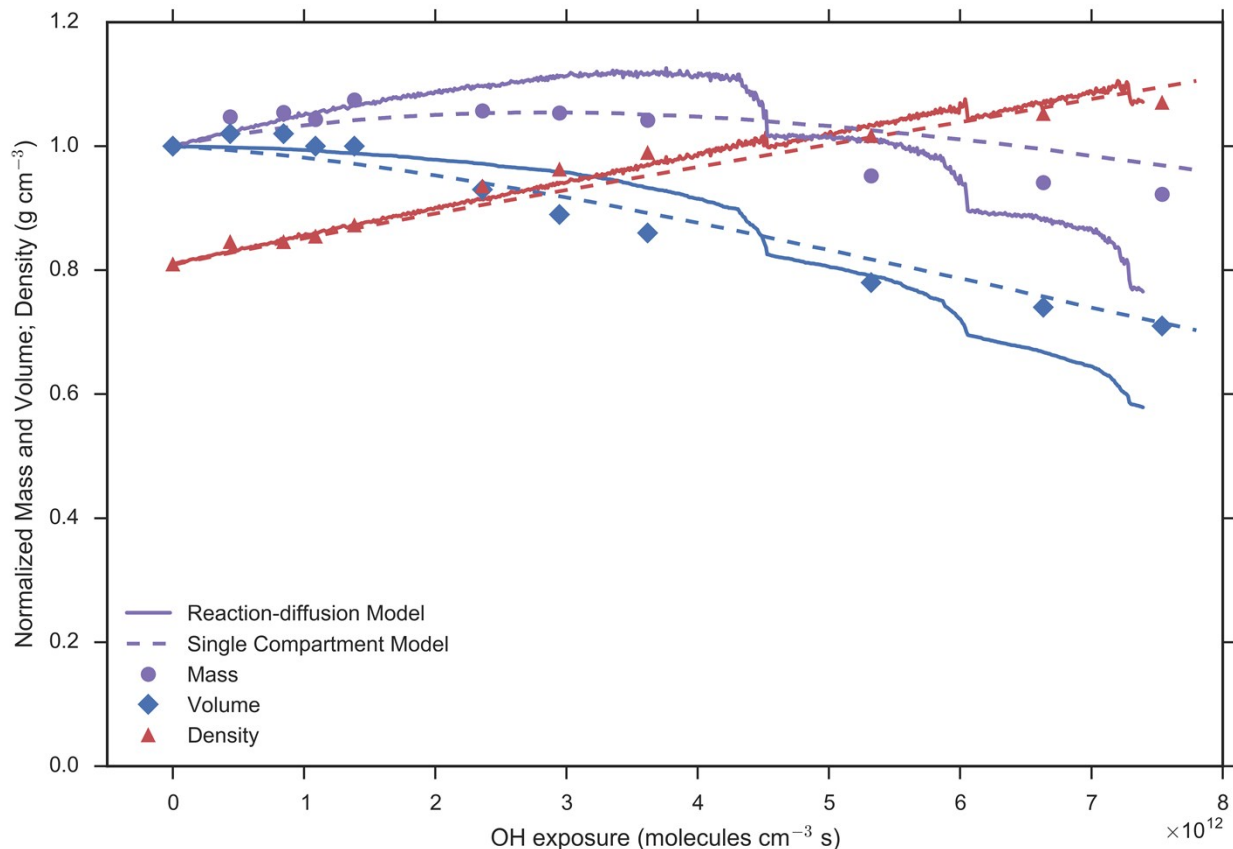

184

185 **Fig. S1.** Comparison of the measured mass, volume, and density of squalane aerosol with the  
 186 single compartment model from a previous publication<sup>6</sup> and the current reaction-diffusion  
 187 scheme. Discretization errors from the relatively large compartment size needed to run the  
 188 simulation in a reasonable time cause the deviations from the single compartment model.

189

190

#### 191 **S4. Calculation of barrier to fragmentation of alkoxy radical with adjacent** 192 **carboxylic acid group**

193 The transition state for the following reaction was calculated to estimate its rate coefficient,  
 194 which has not been measured:

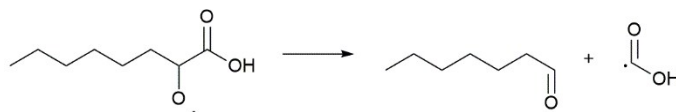

195

196 The results of the calculations are presented here.

#### 197 **Alkoxy Radical Ground State**

198 Solvent model: SCF n-Hexadecane

199 [UB3LYP 6-31G(d,p);FOpt]

200 HF = -539.5317937

201 S2 = 0.753384  
 202  
 203 [UB3LYP 6-31G(d,p);Freq]  
 204 HF = -539.5317937  
 205 S2 = 0.753384  
 206  
 207 [Thermochemistry]  
 208 Zero-point Correction = 0.223557  
 209 Enthalpy Correction = 0.237724  
 210 Free Energy Correction = 0.180568  
 211  
 212 [Geometry]  
 213 H 2.050627 0.657783 1.323780  
 214 C 0.831978 -0.396493 -0.126754  
 215 H 0.898700 -1.361842 0.383780  
 216 H 0.863246 -0.608565 -1.202630  
 217 C -0.469244 0.325065 0.233593  
 218 H -0.468959 1.315737 -0.236432  
 219 H -0.500043 0.499197 1.319112  
 220 C -1.722068 -0.450758 -0.190486  
 221 H -1.691452 -0.622343 -1.275708  
 222 H -1.709519 -1.446735 0.274334  
 223 C -3.030036 0.262423 0.172854  
 224 H -3.041872 1.257998 -0.293051  
 225 H -3.060210 0.435845 1.258183  
 226 C -4.286529 -0.508724 -0.249794  
 227 H -4.273595 -1.503728 0.215515  
 228 H -4.256769 -0.681175 -1.334248  
 229 C -5.588517 0.209702 0.117143  
 230 H -5.645581 1.194309 -0.360731  
 231 H -6.465726 -0.364332 -0.198736  
 232 H -5.664316 0.364098 1.199590  
 233 O 2.143034 1.662670 -0.349386  
 234  
 235 [Frequencies]  
 236  
 237 16.5569 37.3625 51.4442  
 238 65.1569 98.3920 129.1573  
 239 158.6753 161.7396 214.4714  
 240 250.8992 277.2465 314.7886  
 241 397.8945 424.4328 435.8896  
 242 508.3189 584.9527 641.2195  
 243 718.8889 736.0859 750.9819  
 244 799.3666 842.7848 890.4769  
 245 901.8980 955.4984 998.6025  
 246 1014.5292 1028.3029 1044.0360

|     |                                        |           |                     |
|-----|----------------------------------------|-----------|---------------------|
| 247 | 1062.2733                              | 1071.1387 | 1098.5232           |
| 248 | 1127.1198                              | 1149.1649 | 1187.1580           |
| 249 | 1216.9433                              | 1243.9491 | 1255.2851           |
| 250 | 1290.4653                              | 1311.6749 | 1326.2162           |
| 251 | 1338.0151                              | 1342.6228 | 1363.3650           |
| 252 | 1374.4738                              | 1406.5706 | 1416.7407           |
| 253 | 1424.5833                              | 1491.3618 | 1494.9933           |
| 254 | 1497.1263                              | 1507.3364 | 1510.4624           |
| 255 | 1518.2752                              | 1525.2968 | 1827.4926           |
| 256 | 2848.2123                              | 3010.5486 | 3012.3854           |
| 257 | 3018.2493                              | 3025.2471 | 3035.7702           |
| 258 | 3036.4533                              | 3048.6279 | 3053.7164           |
| 259 | 3065.1461                              | 3078.1714 | 3104.3147           |
| 260 | 3109.4163                              | 3111.7559 | 3743.7030           |
| 261 |                                        |           |                     |
| 262 | <b>Alkoxy Radical Transition State</b> |           |                     |
| 263 |                                        |           |                     |
| 264 | Solvent model: SCF n-Hexadecane        |           |                     |
| 265 |                                        |           |                     |
| 266 | [UB3LYP 6-31G(d,p);FTS]                |           |                     |
| 267 | HF = -539.5087462                      |           |                     |
| 268 | S2 = 0.765959                          |           |                     |
| 269 |                                        |           |                     |
| 270 | [UB3LYP 6-31G(d,p);Freq]               |           |                     |
| 271 | HF = -539.5087462                      |           |                     |
| 272 | S2 = 0.765959                          |           |                     |
| 273 |                                        |           |                     |
| 274 | [Thermochemistry]                      |           |                     |
| 275 | Zero-point Correction = 0.220983       |           |                     |
| 276 | Enthalpy Correction = 0.235700         |           |                     |
| 277 | Free Energy Correction = 0.177186      |           |                     |
| 278 |                                        |           |                     |
| 279 | [Geometry]                             |           |                     |
| 280 | C                                      | -3.587191 | 0.574412 0.082177   |
| 281 | O                                      | -4.678277 | -0.160111 -0.005351 |
| 282 | H                                      | -5.456316 | 0.428552 -0.084090  |
| 283 | O                                      | -3.441041 | 1.758484 0.078320   |
| 284 | C                                      | -1.916441 | -0.774360 0.288277  |
| 285 | H                                      | -2.112072 | -0.728933 1.384752  |
| 286 | C                                      | -0.779839 | 0.115012 -0.185785  |
| 287 | H                                      | -0.874636 | 1.110845 0.260126   |
| 288 | H                                      | -0.845603 | 0.218275 -1.274274  |
| 289 | C                                      | 0.573759  | -0.510362 0.204744  |
| 290 | H                                      | 0.649249  | -1.505366 -0.251407 |
| 291 | H                                      | 0.604462  | -0.665002 1.292461  |
| 292 | C                                      | 1.771015  | 0.348806 -0.219683  |



293 H 1.740737 0.498706 -1.307884  
 294 H 1.676946 1.348333 0.227789  
 295 C 3.123114 -0.258729 0.173224  
 296 H 3.214776 -1.260321 -0.270461  
 297 H 3.152475 -0.406167 1.262337  
 298 C 4.323938 0.594712 -0.253248  
 299 H 4.229008 1.597098 0.186136  
 300 H 4.296942 0.737581 -1.342025  
 301 C 5.670935 -0.013312 0.148728  
 302 H 5.810055 -1.002190 -0.302966  
 303 H 6.506571 0.618120 -0.170339  
 304 H 5.742197 -0.134988 1.235642  
 305 O -2.306999 -1.762323 -0.357519  
 306  
 307 [Frequencies]  
 308 -268.3432 21.8233 31.0676  
 309 54.2662 62.9633 85.3929  
 310 122.5265 139.6496 152.7165  
 311 186.2395 203.4727 248.8712  
 312 251.8820 297.5965 372.2678  
 313 445.0261 464.4042 526.6486  
 314 581.5477 624.8419 736.3907  
 315 751.7426 805.3958 882.3880  
 316 898.0351 910.5337 964.1026  
 317 1011.3444 1015.6418 1039.2058  
 318 1056.2824 1069.1891 1119.5716  
 319 1133.6287 1162.4178 1226.7193  
 320 1247.0237 1280.5064 1305.0606  
 321 1316.0478 1322.2653 1335.3583  
 322 1341.0583 1359.8920 1381.3328  
 323 1397.9007 1412.9532 1424.7316  
 324 1485.7471 1495.2317 1497.3182  
 325 1506.7705 1509.7558 1517.3660  
 326 1525.2554 1594.4009 1879.1304  
 327 2855.0291 3010.9738 3014.9315  
 328 3022.2557 3026.3364 3035.8913  
 329 3036.1877 3048.3765 3056.6631  
 330 3063.4647 3076.0758 3103.6548  
 331 3109.2975 3112.9302 3637.5733  
 332  
 333

### 334 **S5. Semi-detailed description of acyloxy radical fragmentation processes**

335 When a fragmentation reaction is initially selected by the simulation algorithm, the reaction is  
 336 separated into three separate steps as shown schematically for R(O)O radicals in Fig. S2.  
 337 Following loss of CO<sub>2</sub>, a neighbouring functional group is randomly selected with a probability  
 338 proportional to the relative abundance of each group to form the appropriate radical fragment.

339 For example, if the neighbouring functional group is a ketone, an acyl radical will be formed.  
 340 Finally, the simulation randomly selects a carbon backbone species with a probability  
 341 proportional to the relative abundance of each type and a fragmentation step to form smaller  
 342 carbon fragments. For example, for a secondary RO radical, a 20 carbon backbone may fragment  
 343 to form two of any of the following possible carbon backbone species: C<sub>2</sub> and C<sub>18</sub>, C<sub>3</sub> and C<sub>17</sub>, C<sub>4</sub>  
 344 and C<sub>16</sub>, C<sub>5</sub> and C<sub>15</sub>, C<sub>6</sub> and C<sub>14</sub>, C<sub>7</sub> and C<sub>13</sub>, C<sub>8</sub> and C<sub>12</sub>, C<sub>9</sub> and C<sub>11</sub>, or two C<sub>10</sub> species.

345

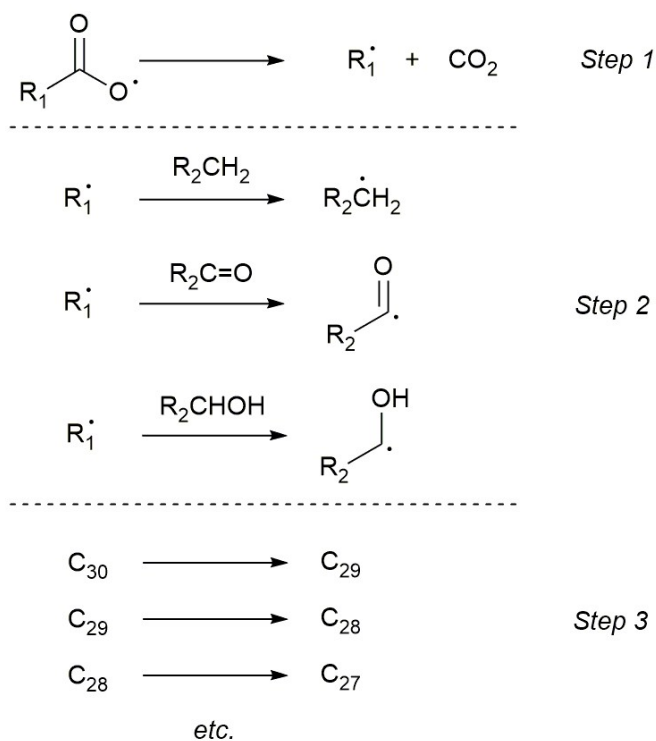

346

347 **Fig. S2.** Schematic representation of acyloxy fragmentation as an example of how the many  
 348 possibilities of fragmentation are handled in the reaction scheme. First, the alkoxy radical  
 349 fragments to form CO<sub>2</sub> and a pseudo-intermediate R<sub>1</sub>. Then, R<sub>1</sub> “reacts” with an adjacent  
 350 functional group based on their relative abundance. Finally, a carbon backbone is converted into  
 351 two separate carbon backbones with a probability based on the relative abundance of the initial  
 352 backbone.

353

354

355

### 356 **S6. Determination of evaporation rate coefficients for fragments**

357 Each carbon backbone species has several variants depending on the number of primary  
 358 functional groups. For example, a 28 carbon backbone has the following variants: C<sub>28</sub> (one  
 359 primary functional group), C<sub>28</sub>O<sub>2</sub> (two primary functional groups), C<sub>28</sub>COOH (one carboxylic

360 acid group), C<sub>28</sub>O-COOH (one carboxylic acid group and one primary functional group), and  
 361 C<sub>28</sub>(COOH)<sub>2</sub> (a dicarboxylic acid).

362 The evaporation rate coefficients for the fragments are determined from the Hertz-Knudsen  
 363 equation, Raoult's Law, and the vapor pressure estimated with the EVAPORATION model<sup>10</sup>  
 364 ( $p_{\text{sat}}$ ) in a similar manner to a previous publication.<sup>6</sup> Here, the simulated volume ( $V_{\text{sim}}$ ) and area  
 365 ( $A_{\text{sim}}$ ) are used with the flux to obtain the following equation for the evaporation rate coefficient  
 366 ( $k_{\text{evap}}$ ):

$$367 \quad k_{\text{evap}} = \frac{\alpha p_{\text{sat}} A_{\text{sim}}}{V_{\text{sim}} [\text{RH}]} \sqrt{\frac{N_A}{2\pi M k_B T}} \quad (\text{S3})$$

368 where  $\alpha$  is the accommodation coefficient (assumed to be 1), [RH] is the initial molecular  
 369 density of triacontane,  $N_A$  is avogadro's number,  $M$  is the molecular mass of the evaporating  
 370 species. Since primary alcohols and aldehydes have evaporation rate coefficients within an order  
 371 of magnitude of each other, they are lumped together as a single carbon backbone species for the  
 372 purposes of evaporation. The coefficients are presented in Table S3.

373

374 **Table S3.** Rate coefficients for evaporation of species based on their carbon number and primary  
 375 functional groups.

| Carbon number | $k_{1\text{prim}} (\text{s}^{-1})$ | $k_{2\text{prim}} (\text{s}^{-1})$ | $k_{\text{COOH}} (\text{s}^{-1})$ | $k_{1\text{prim,COOH}} (\text{s}^{-1})$ | $k_{\text{diacid}} (\text{s}^{-1})$ |
|---------------|------------------------------------|------------------------------------|-----------------------------------|-----------------------------------------|-------------------------------------|
| 2             | $2.6 \times 10^6$                  | $1.4 \times 10^5$                  | $1.1 \times 10^5$                 | $6.1 \times 10^3$                       | 3.9                                 |
| 3             | $7.5 \times 10^5$                  | $4.2 \times 10^4$                  | $3.1 \times 10^4$                 | $1.8 \times 10^3$                       | $6.4 \times 10^{-2}$                |
| 4             | $2.2 \times 10^5$                  | $1.3 \times 10^4$                  | $9.4 \times 10^3$                 | $5.5 \times 10^2$                       | $6.6 \times 10^{-3}$                |
| 5             | $6.6 \times 10^4$                  | $3.9 \times 10^3$                  | $2.9 \times 10^3$                 | $1.7 \times 10^2$                       | $1.1 \times 10^{-1}$                |
| 6             | $2.0 \times 10^4$                  | $1.2 \times 10^3$                  | $8.8 \times 10^2$                 | $5.3 \times 10^1$                       | $1.5 \times 10^{-3}$                |
| 7             | $6.2 \times 10^3$                  | $3.7 \times 10^2$                  | $2.7 \times 10^2$                 | $1.6 \times 10^1$                       | $7.4 \times 10^{-3}$                |
| 8             | $1.9 \times 10^3$                  | $1.1 \times 10^2$                  | $8.5 \times 10^1$                 | 5.1                                     | $1.7 \times 10^{-4}$                |
| 9             | $5.9 \times 10^2$                  | $3.6 \times 10^1$                  | $2.7 \times 10^1$                 | 1.6                                     | $8.0 \times 10^{-4}$                |
| 10            | $1.9 \times 10^2$                  | $1.1 \times 10^1$                  | 8.3                               | $5.0 \times 10^{-1}$                    | $7.7 \times 10^{-6}$                |
| 11            | $5.8 \times 10^1$                  | 3.5                                | 2.6                               | $1.6 \times 10^{-1}$                    | $2.4 \times 10^{-6}$                |
| 12            | $1.8 \times 10^1$                  | 1.1                                | $8.3 \times 10^{-1}$              | $5.0 \times 10^{-2}$                    | $7.7 \times 10^{-7}$                |
| 13            | 5.7                                | $3.5 \times 10^{-1}$               | $2.6 \times 10^{-1}$              | $1.6 \times 10^{-2}$                    | $2.4 \times 10^{-7}$                |
| 14            | 1.9                                | $1.1 \times 10^{-1}$               | $8.3 \times 10^{-2}$              | $5.1 \times 10^{-3}$                    | $7.8 \times 10^{-8}$                |
| 15            | $5.8 \times 10^{-1}$               | $3.6 \times 10^{-2}$               | $2.6 \times 10^{-2}$              | $1.6 \times 10^{-3}$                    | $2.5 \times 10^{-8}$                |
| 16            | $1.8 \times 10^{-1}$               | $1.1 \times 10^{-2}$               | $8.4 \times 10^{-3}$              | $5.1 \times 10^{-4}$                    | $7.9 \times 10^{-9}$                |
| 17            | $5.9 \times 10^{-2}$               | $3.6 \times 10^{-3}$               | $2.7 \times 10^{-3}$              | $1.6 \times 10^{-4}$                    | -                                   |
| 18            | $1.9 \times 10^{-2}$               | $1.2 \times 10^{-3}$               | $8.5 \times 10^{-4}$              | $5.3 \times 10^{-5}$                    | -                                   |
| 19            | $6.0 \times 10^{-3}$               | $3.7 \times 10^{-4}$               | $2.7 \times 10^{-4}$              | $1.7 \times 10^{-5}$                    | -                                   |
| 20            | $1.9 \times 10^{-3}$               | $1.2 \times 10^{-4}$               | $8.7 \times 10^{-5}$              | $5.4 \times 10^{-6}$                    | -                                   |
| 21            | $6.1 \times 10^{-4}$               | $3.8 \times 10^{-5}$               | $2.8 \times 10^{-5}$              | $1.7 \times 10^{-6}$                    | -                                   |
| 22            | $2.0 \times 10^{-4}$               | $1.2 \times 10^{-5}$               | $8.9 \times 10^{-6}$              | $5.5 \times 10^{-7}$                    | -                                   |
| 23            | $6.3 \times 10^{-5}$               | $3.9 \times 10^{-6}$               | $2.9 \times 10^{-6}$              | $1.8 \times 10^{-7}$                    | -                                   |
| 24            | $2.0 \times 10^{-5}$               | $1.2 \times 10^{-6}$               | $9.2 \times 10^{-7}$              | $5.7 \times 10^{-8}$                    | -                                   |

|    |                      |                      |                      |                       |   |
|----|----------------------|----------------------|----------------------|-----------------------|---|
| 25 | $6.4 \times 10^{-6}$ | $4.0 \times 10^{-7}$ | $3.0 \times 10^{-7}$ | $1.8 \times 10^{-8}$  | - |
| 26 | $2.1 \times 10^{-6}$ | $1.3 \times 10^{-7}$ | $9.5 \times 10^{-8}$ | $5.9 \times 10^{-9}$  | - |
| 27 | $6.7 \times 10^{-7}$ | $4.1 \times 10^{-8}$ | $3.1 \times 10^{-8}$ | $1.9 \times 10^{-9}$  | - |
| 28 | $2.1 \times 10^{-7}$ | $1.3 \times 10^{-8}$ | $9.9 \times 10^{-9}$ | $6.1 \times 10^{-10}$ | - |
| 29 | $6.9 \times 10^{-8}$ | $4.3 \times 10^{-9}$ | $3.2 \times 10^{-9}$ | $2.0 \times 10^{-10}$ | - |
| 30 | $2.2 \times 10^{-8}$ | $1.4 \times 10^{-9}$ | $1.0 \times 10^{-9}$ | $6.4 \times 10^{-11}$ | - |

376

377 As evaporation proceeds, compartments are emptied of molecules and the active surface of the  
378 aerosol particle retreats toward the center of the particle. To simulate this process, evaporation is  
379 only allowed when (adsorption) sites are present in the compartment. These are defined at the  
380 start of the simulation in the top compartment only, and are created in lower compartments. As  
381 the carbon backbone and associated functional groups are converted into gas phase species by  
382 evaporation, a number of “bulk” free volume species equal to the number of carbons is converted  
383 into surface sites. If there are no remaining “bulk” species in the same compartment, then ones in  
384 the next compartment are converted to surface sites. In the process, an additional species termed  
385 “gas” is formed that helps define the location of the interface. Because of the statistical nature of  
386 event selection, occasionally a species associated with the condensed phase (i.e. a functional  
387 group or carbon backbone) can be found in a compartment above the one containing a “gas”  
388 species. When this occurs the gas and condensed phase species immediately exchange places to  
389 prevent residual condensed phase material remaining in compartments that have become  
390 disconnected from the particle.

391

### 392 **S7. Dynamic viscosity measurement of triacontane to estimate self-diffusion** 393 **coefficient**

394 The dynamic viscosity of pure, solid triacontane (98% purity, Sigma-Aldrich) was measured as a  
395 function of plate oscillation using a Parallel Plate TA Instruments Discovery Hybrid Series  
396 DHR-2 Rheometer with an 8 mm plate geometry. An 8 mm ID O-ring was placed atop the  
397 Peltier plate of the rheometer, directly below the plate geometry. The temperature of the Peltier  
398 plate was maintained at 72°C, which is 5°C greater than the upper end of the melting point range  
399 of triacontane (67°C). The triacontane sample was first melted separately in a beaker on a hot  
400 plate at 90°C and then poured into the O-ring. The plate geometry was lowered slowly until  
401 touched with the liquid sample at the trim gap of 1550 μm. The Peltier plate was then cooled to  
402 25°C. To ensure firm contact with the cooled, compacted solid sample, the plate geometry was  
403 lowered 50 μm to the measurement gap of 1500 μm. At this height, the plate geometry was  
404 unable to freely rotate if turned. A logarithmic sweep from 10 to 10<sup>-3</sup> rad s<sup>-1</sup> using a displacement  
405 of approximately 10<sup>-3</sup> radians was used to find the loss modulus ( $G''$ ) and thus dynamic viscosity  
406 ( $\eta'$ ) of triacontane as a function of oscillation frequency ( $\omega$ ). The results from these  
407 measurements were then used estimate the zero-shear limit of the dynamic viscosity ( $\eta_0$ ) and the  
408 self-diffusion coefficient of triacontane as follows:<sup>13</sup>

$$409 \quad \eta_0 = \lim_{\omega \rightarrow 0} \frac{G''}{\omega} \quad (\text{S4})$$

410 The results of one set of these measurements is shown in Fig. S3.

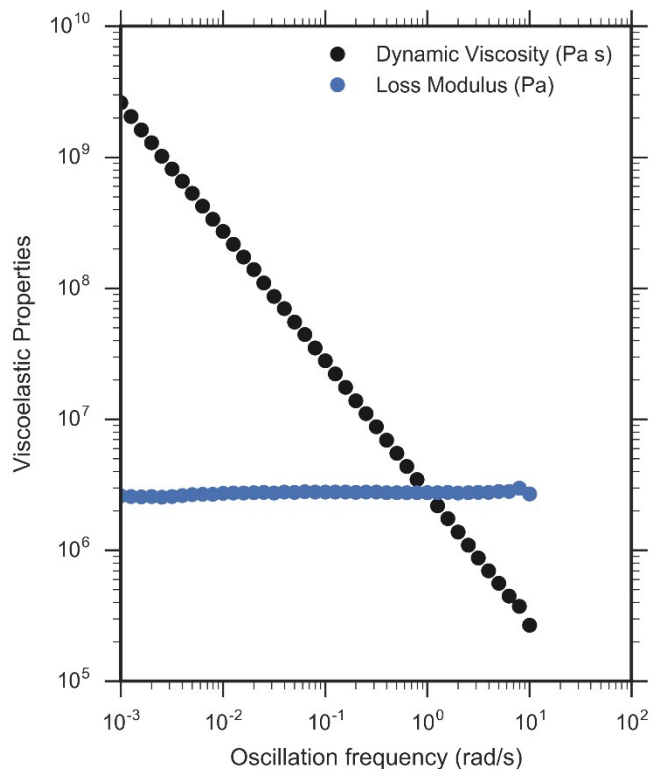

411

412 **Fig. S3.** The loss modulus and dynamic viscosity of triacontane as a function of the oscillation  
413 frequency.

414

#### 415 **S8. Maps of peroxy radicals during oxidation**

416 The calculated spatial distributions of peroxy radicals formed during triacontane oxidation using  
417 Scenarios 1 and 1A are plotted in Figures S4 and S5, respectively. It is clear that active reactions are  
418 strictly confined to the surface in Scenario 1 while they can occur throughout the particle in Scenario 1A.

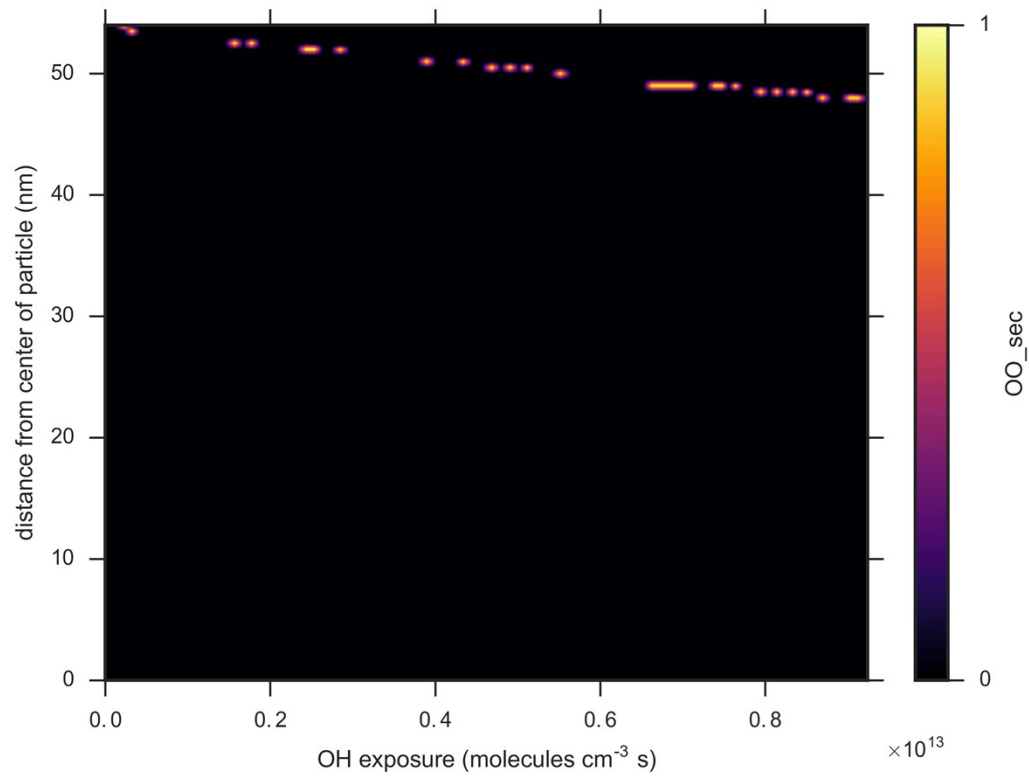

419

420 **Figure S4.** Plot of peroxy radical concentrations as a function of position and OH exposure under  
421 Scenario 1. The radicals are confined to the surface of the reacting aerosol particle.

422

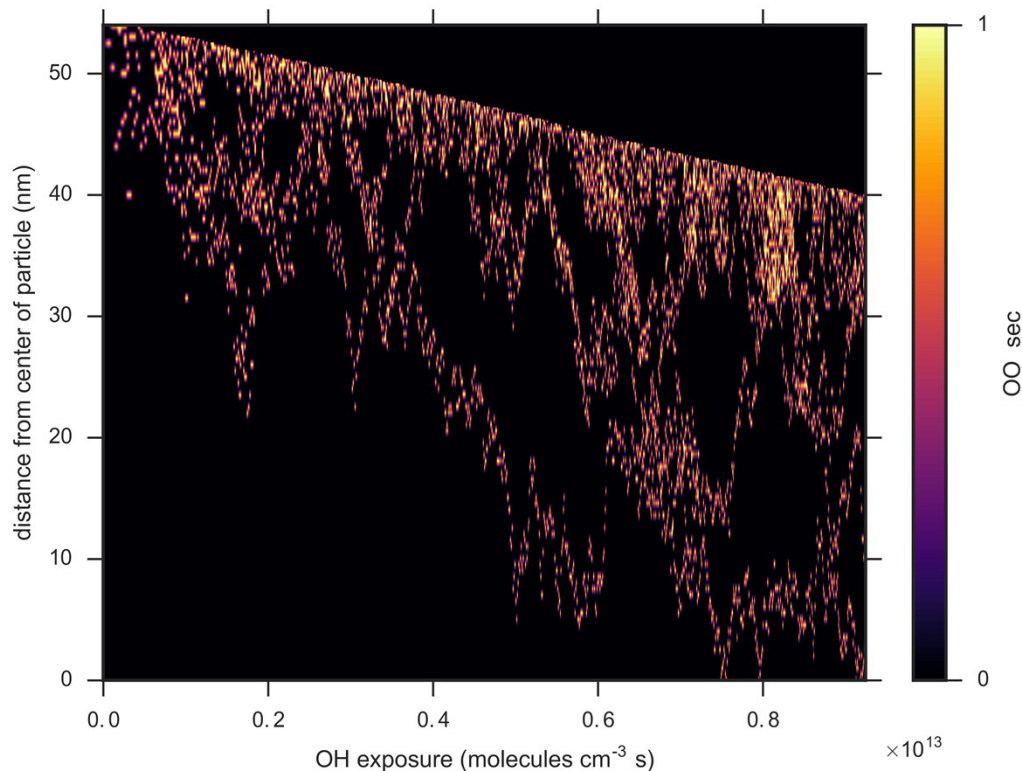

423

424 **Figure S5.** Plot of peroxy radical concentrations as a function of position and OH exposure under  
 425 Scenario 1A. The radicals are found throughout the reacting particle.

426

427 S9. Additional plasticized particle Scenario 2A

428 Scenario 2A is analogous to Scenario 1A and evaluates the effect of plasticization during  
 429 exposure to OH when the gas-phase value for the OH + CO(OH) reaction rate coefficient is used.  
 430 Simulation results are shown in Figures S6 and S7. When the particle is 145nm in diameter, the  
 431 agreement between triacontane disappearance for Scenarios 1A and 2A is comparable. When it is  
 432 109nm in diameter however, the differences are dramatic. The increased value of  $k_{\text{OH}+\text{COOH}}$  in  
 433 Scenario 2A can improve the agreement between the predicted and measured carbon and  
 434 hydrogen content, but the agreement with the mass and oxygen content is not as good as in  
 435 Scenario 1A.

436 Further investigation of Scenarios 1A and 2A reveals why Scenario 1A, which involves  
 437 plasticization with oxidation, best predicts the measured effective uptake coefficient, aerosol  
 438 mass, and elemental composition. As shown in Fig. 10, the internal distribution of oxidized  
 439 material extends approximately 20 nm into the aerosol with a peak value of 0.6 at the surface at  
 440 an OH exposure of  $2 \times 10^{12}$  molecules  $\text{cm}^{-3}$  s while the average O/C ratio is 0.2. The broader  
 441 internal distribution of oxidation limits the fragmentation chemistry and subsequent evaporation  
 442 of volatile material from the particle. An unreacted core of the starting material remains in the  
 443 inner 30 nm of the aerosol. Increasing the relative importance of fragmentation reactions as in  
 444 Scenario 2A promotes more volatilization of otherwise non-volatile carboxylic acids and leads to

445 a too-rapid disappearance of triacontane and low extent of oxidation relative to experiment. It is  
446 clear that the overall transformation kinetics are very sensitive to the balance between surface  
447 reactions when the particle is highly oxidized, and internal transport.

448

449

450 **Figure S6.** Triacontane disappearance curve for a 145 nm particle, predicted under Scenario 2A with an  
451 adsorption rate coefficient for OH of  $10 \text{ s}^{-1}$ . The results are to be compared to Figure 4.

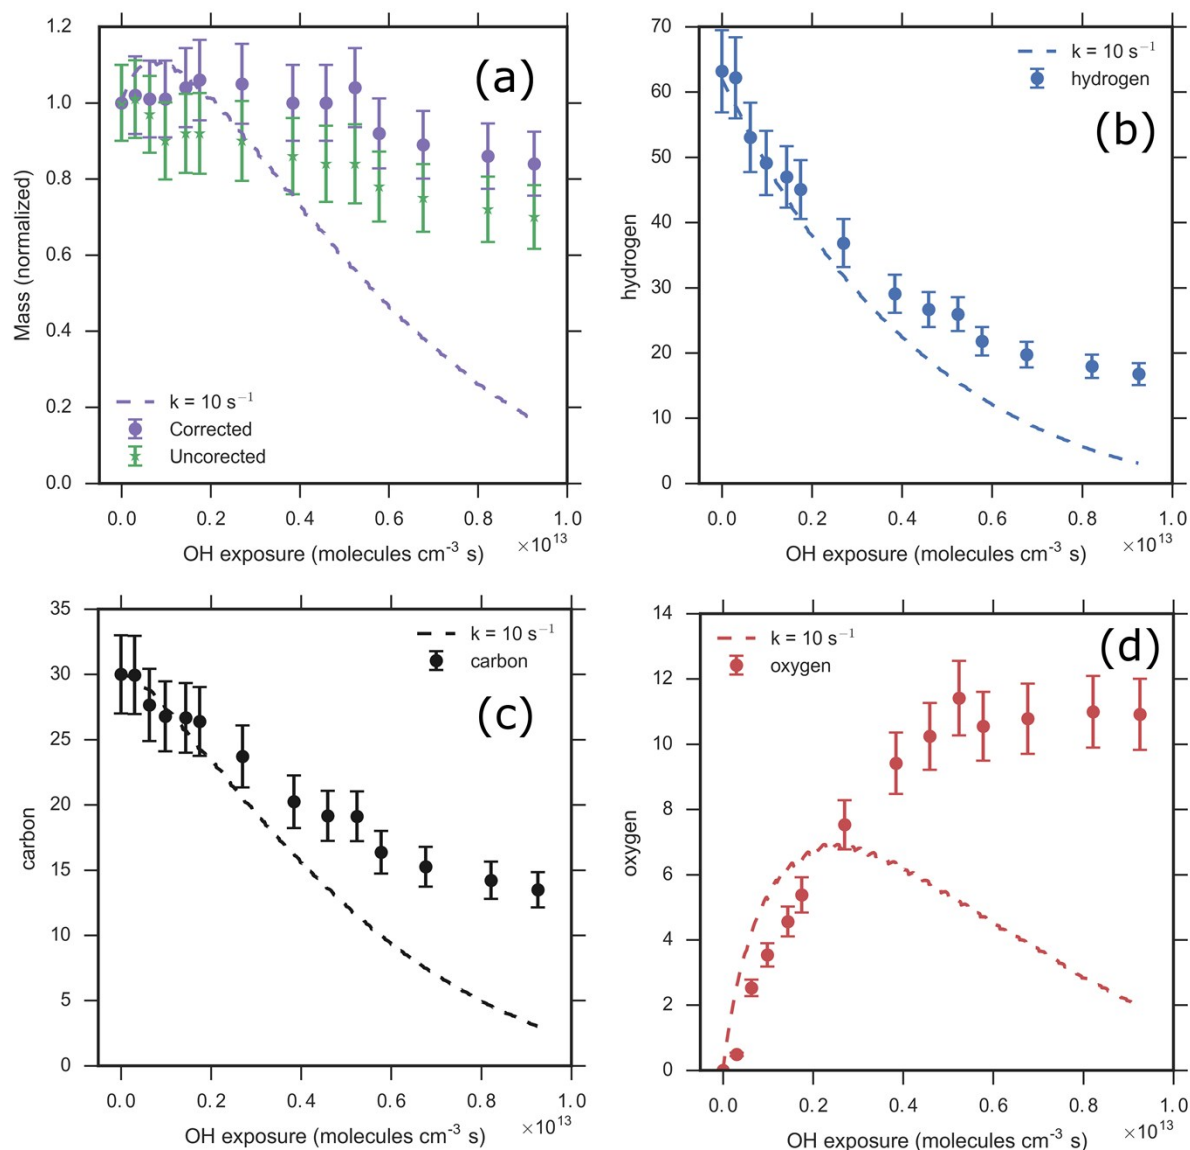

452

453 **Figure S7.** Simulation results for a 109 nm particle, predicted under Scenario 2A with an adsorption rate  
454 coefficient for OH of  $10 \text{ s}^{-1}$ . (a) Mass, (b) H content per molecule, (c) C content per molecule and (d) O  
455 content per molecule. The results are to be compared to Figures 5, 6, and 8.

456



457

## 458 **References**

459

- 460 1. D. Bunker, B. Garrett, T. Kleindienst and G. L. III, *Combustion and Flame*, 1974, **23**,  
461 373-379.
- 462 2. D. T. Gillespie, *J Comput Phys*, 1976, **22**, 403-434.
- 463 3. F. A. Houle, W. D. Hinsberg, M. Morrison, M. I. Sanchez, G. Wallraff, C. Larson and J.  
464 Hoffnagle, *Journal of Vacuum Science & Technology B: Microelectronics and*  
465 *Nanometer Structures*, 2000, **18**, 1874.
- 466 4. A. Bondi, *The Journal of Physical Chemistry*, 1964, **68**, 441-451.
- 467 5. M. H. Cohen and D. Turnbull, *The Journal of Chemical Physics*, 1959, **31**, 1164-1169.
- 468 6. A. K. Doolittle, *J Appl Phys*, 1951, **22**, 1471-1475.
- 469 7. B. Cordero, V. Gómez, A. E. Platero-Prats, M. Revés, J. Echeverría, E. Cremades, F.  
470 Barragán and S. Alvarez, *Dalton Transactions*, 2008, DOI: 10.1039/b801115j, 2832-  
471 2838.
- 472 8. A. A. Wiegel, K. R. Wilson, W. D. Hinsberg and F. A. Houle, *Phys. Chem. Chem. Phys.*,  
473 2015, **17**, 4398-4411.
- 474 9. K. R. Wilson, J. D. Smith, S. H. Kessler and J. H. Kroll, *Phys Chem Chem Phys*, 2012,  
475 **14**, 1468-1479.
- 476 10. Y. Katrib, G. Biskos, P. R. Buseck, P. Davidovits, J. T. Jayne, M. Mochida, M. E. Wise,  
477 D. R. Worsnop and S. T. Martin, *The Journal of Physical Chemistry A*, 2005, **109**,  
478 10910-10919.
- 479 11. P. F. DeCarlo, J. G. Slowik, D. R. Worsnop, P. Davidovits and J. L. Jimenez, *Aerosol*  
480 *Science and Technology*, 2004, **38**, 1185-1205.
- 481 12. F. A. Houle, W. D. Hinsberg and K. R. Wilson, *Phys. Chem. Chem. Phys.*, 2015, **17**,  
482 4412-4423.
- 483 13. C. B. Gell, W. W. Graessley and L. J. Fetters, *Journal of Polymer Science Part B:*  
484 *Polymer Physics*, 1997, **35**, 1933-1942.

485
